# Supplementary material
Source: Royal Society of Chemistry journal article supplement (doi:10.1039/d6ay00299d)
Supplement: d6ay00299d1.pdf [file d6ay00299d1.pdf]

# One-pot iron determination in fortified flours using thymol–1,10-phenanthroline deep eutectic solvent and smartphone-based digital image photometry

**Samara Soares<sup>a,\*</sup>, Maria C. Hespanhol<sup>b</sup>, Fábio R. P. Rocha<sup>a</sup>**

<sup>a</sup> Center for Nuclear Energy in Agriculture, University of São Paulo, Av. Centenário, 303, 13416-000, Piracicaba, SP, Brazil

<sup>b</sup> Chemistry Department, Center of Exact and Technology Sciences, Federal University of Viçosa, 36570-900, Viçosa, MG, Brazil

---

\*Corresponding author

E-mail: [soaressamara@usp.br](mailto:soaressamara@usp.br)

Eq S1

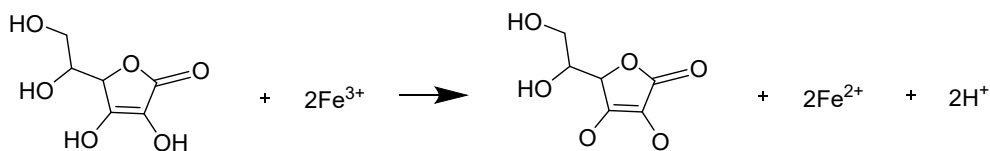

Eq. S2

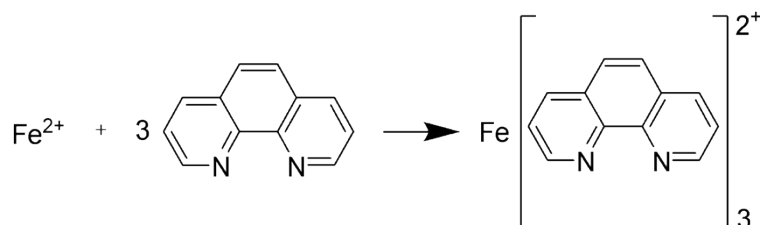

**Table S1.** AGREEprep evaluation of the proposed procedure

| Criterion                                                     | Description                                                  | Score | Weight |
|---------------------------------------------------------------|--------------------------------------------------------------|-------|--------|
| 1. Sample preparation placement                               | In situ                                                      | 0.66  | 1      |
| 2. Hazardous materials                                        | 0.025 g                                                      | 0.87  | 5      |
| 3. Sustainability, renewability, and reusability of materials | > 75% of reagents and materials are sustainable or renewable | 0.75  | 2      |
| 4. Waste                                                      | 0.35 g                                                       | 0.80  | 4      |
| 5. Sample                                                     | Mass or volume of the sample: 0.05 g                         | 1.00  | 2      |
| 6. Sample throughput                                          | 24 [samples/h]                                               | 0.75  | 3      |
| 7. Integration and automation                                 | Sample prep. steps: 2 steps or fewer, manual systems         | 0.25  | 2      |
| 8. Energy consumption                                         | 0.1 [W]                                                      | 1.00  | 4      |

| Criterion                                             | Description        | Score | Weight |
|-------------------------------------------------------|--------------------|-------|--------|
| 9. Post-sample preparation configuration for analysis | Simple: smartphone | 1.00  | 2      |
| 10. Operator's safety                                 | 2 hazards          | 0.50  | 3      |
| <b>AGREEprep index</b>                                |                    | 0.78  |        |

**Table S2.** AGREEprep evaluation of the extraction/ICP-OES procedure

| Criterion                                                     | Description                                                            | Score | Weight |
|---------------------------------------------------------------|------------------------------------------------------------------------|-------|--------|
| 1. Sample preparation placement                               | Ex situ                                                                | 0.00  | 1      |
| 2. Hazardous materials                                        | 5 mL                                                                   | 0.10  | 5      |
| 3. Sustainability, renewability, and reusability of materials | Materials are not sustainable or renewable, but are used several times | 0.50  | 2      |
| 4. Waste                                                      | 5.25 mL                                                                | 0.36  | 4      |
| 5. Sample                                                     | Mass or volume of the sample: 0.25 g                                   | 0.87  | 2      |
| 6. Sample throughput                                          | 24 [samples/h]                                                         | 0.75  | 3      |
| 7. Integration and automation                                 | Sample prep. steps: 2 steps or fewer, manual systems                   | 0.25  | 2      |
| 8. Energy consumption                                         | 10 W                                                                   | 1.00  | 4      |
| 9. Post-sample preparation configuration for analysis         | Advanced MS with high energy and/or noble gas consumption: ICP-OES     | 0.00  | 2      |
| 10. Operator's safety                                         | 2 hazards                                                              | 0.50  | 3      |
| <b>AGREEprep index</b>                                        |                                                                        | 0.46  |        |

**Table S3.** AGREEprep evaluation of the digestion/ICP-OES procedure

| <b>Criterion</b>                                              | <b>Description</b>                                                     | <b>Score</b> | <b>Weight</b> |
|---------------------------------------------------------------|------------------------------------------------------------------------|--------------|---------------|
| 1. Sample preparation placement                               | Ex situ                                                                | 0.00         | 1             |
| 2. Hazardous materials                                        | 14 mL                                                                  | 0.00         | 5             |
| 3. Sustainability, renewability, and reusability of materials | Materials are not sustainable or renewable, but are used several times | 0.50         | 2             |
| 4. Waste                                                      | 13 mL                                                                  | 0.22         | 4             |
| 5. Sample                                                     | Mass or volume of the sample: 0.25 g                                   | 0.87         | 2             |
| 6. Sample throughput                                          | 16 [samples/h]                                                         | 0.65         | 3             |
| 7. Integration and automation                                 | Sample prep. steps: 2 steps or fewer, manual systems                   | 0.25         | 2             |
| 8. Energy consumption                                         | 1500 W                                                                 | 0.00         | 4             |
| 9. Post-sample preparation configuration for analysis         | Advanced MS with high energy and/or noble gas consumption: ICP-OES.    | 0.00         | 2             |
| 10. Operator's safety                                         | 2 hazards                                                              | 0.50         | 3             |
| <b>AGREEprep index</b>                                        |                                                                        | <b>0.27</b>  |               |
